# Supplementary material for: Utility of olfactory identification test for screening of cognitive dysfunction in community-dwelling older adults
Source: PeerJ. 2021 Dec 20;9:e12656. doi: 10.7717/peerj.12656 (PMC8697762; doi:10.7717/peerj.12656)
Supplement: Supplemental Information 2 [file peerj-09-12656-s002.xlsx]

## Sheet: 質問表
			アンケート
						記載日： 年 月 日
設問１．生年月日を西暦で記載してください。
	年 月 日
設問２．性別に〇をつけてください。
	男性 ・ 女性
設問３．喫煙歴(過去を含む)の有無について下記に〇をつけ、 喫煙年数（1日あたり本数×年）
を記載してください。
	有り（ 年） ・ 無し
設問４．飲酒歴(過去を含む)の有無について下記に〇をつけ、 飲酒年数（1日あたり飲酒量×年数）
を記載してください。
	有り（ 年） ・ 無し
設問５．アレルギーの有無について下記に〇をつけてください。
	有り ・ 無し
設問６．教育年数について該当の年数に〇をつけてください。その他の場合は年数も記載してください。
	6年（小学校卒） ・ 9年（中学校卒） ・ 12年（高校卒）
	14年（専門学卒） ・ 16年（大卒）・ その他（ 年）
設問７．平均睡眠時間を教えてください。
	時間
設問８．生活状況について①、②いずれかに〇をつけてください。
	① （一人暮らし） ・ ② （家族と同居、または夫婦で暮らしている）
設問９．日常の状況について該当するものに「はい」「いいえ」いずれかに〇をつけてください。
	①横断歩道を信号が青の状況で渡り切れますか？ はい ・ いいえ
	②手すりにつかまらないで階段を登れますか？ はい ・ いいえ
	③ペットボトルのフタを開けにくくなったと思いますか？ はい ・ いいえ
	④もの忘れを自覚することはありますか？ はい ・ いいえ
	⑤匂いを感じにくくなったと自覚することはありますか？ はい ・ いいえ
							※裏面へ続きます。
設問１０．【既往歴】
	これまでに病気(身体疾患および精神疾患)にかかったことはありますか。
	有無について下記に〇をつけてください。
	有り ・ 無し
	有りの場合はその病名を可能な限り記載してください。
	➀
	②
	③
	④
	⑤
	⑥
設問１１．【合併症】
	現在、病気（身体疾患および精神疾患）にかかっていますか。
	有無について下記に〇をつけてください。
	有り ・ 無し
	有りの場合はその病名を可能な限り記載してください。
	➀
	②
	③
	④
	⑤
	⑥
設問１２．【併用薬】
	現在、服薬中のお薬（医師に処方されている薬）はありますか。
	有無について下記に〇をつけてください。
	有り ・ 無し
	有りの場合はお薬の名前を可能な限り記載してください。
	➀
	②
	③
	④
	⑤
	⑥
設問１３．	あなたの幸福度についてー１００～＋１００の間で線を引いてください。
	（最高の不幸）						おおよその場所に 線を引く	（最高の幸福）
	例）
	ー100				0			100
	ー100				0			100
