# Supplementary material for: Utility of olfactory identification test for screening of cognitive dysfunction in community-dwelling older adults
Source: PeerJ. 2021 Dec 20;9:e12656. doi: 10.7717/peerj.12656 (PMC8697762; doi:10.7717/peerj.12656)
Supplement: Supplemental Information 3 [file peerj-09-12656-s003.xlsx]

## Sheet: 質問表
			Questionnaire
						date mentioned： / / .
Question１．Please enter your date of birth in Western calendar.
	/ / .
Question２．Please check the appropriate box for your sex.
	male ・ female
Question３．Please circle "yes" or "no" below to indicate whether you have a history of smoking,
(including in the past). If yes, please indicate the number of years you have smoked.
		(number of cigarettes per day x number of years)
	Yes（ year） ・ No
Question４．Please circle "yes" or "no" below to indicate whether you have a history of drinking,
(including in the past). If yes, please indicate the number of years you have been drinking.
(amount of alcohol consumed per day x number of years)
	Yes（ year） ・ No
Question５．Please circle "yes" or "no" below to indicate whether you are allergic or not.
	Yes ・ No
Question６．Please indicate the number of years of education by ticking the appropriate box.
		If other, please list the number of years.
	6 years（elementary school graduate） ・ 9 years（junior high school graduate）
	12 years（high school graduate） ・ 14years（Technical school graduate）
	16 years (university graduate) ・ Others（ years）
Question７．What is your average sleep time?
	hours
Question８．Please circle either (1) or (2) regarding your living situation.。
	① （living by oneself） ・ ② （Living with family or as a couple）
Question９．Please circle "Yes" or "No" for each applicable item regarding your daily situation.
	①Can you cross the crosswalk when the light is green? Yes ・ No
	②Can you climb stairs without holding on to the handrail? Yes ・ No
	③Do you think it has become harder to open the lid of a plastic bottle? Yes ・ No
	④ Are you aware of memory loss? Yes ・ No
	⑤Do you notice that you are less able to smell? Yes ・ No
Question１０．【medical history】
	Have you ever had any illness (physical or mental)?
	Please circle "yes" or "no" below.
	Yes ・ No
	If yes, please list the name of the disease to the best of your ability.
	➀
	②
	③
	④
	⑤
	⑥
Question１１．【complications】
	Are you currently suffering from any illness (physical or mental)?
	Please circle "yes" or "no" below.
	Yes ・ No
	If yes, please list the name of the disease to the best of your ability.
	➀
	②
	③
	④
	⑤
	⑥
Question１２．【concomitant medications】
	Are you currently taking any medications (prescribed by your doctor)?
	Please circle "yes" or "no" below.
	Yes ・ No
	If yes, please list the name of the medication if possible.
	➀
	②
	③
	④
	⑤
	⑥
Question１３．	Please draw a line between -100 and +100 for your level of happiness.
	（Greatest Misfortune）					At an approximate location draw a line		(Supreme Happiness)
	例）
	ー100				0			100
	ー100				0			100
